# Supplementary material
Source: PubMed Central journal article supplement (PMC7940410)
Supplement: 41431_2020_744_MOESM2_ESM.pdf [file 41431_2020_744_MOESM2_ESM.pdf]

Supplemental Appendix: Full list of articles included in this scoping review (n=194) organized by FT Model Efficacy Domain

| Record ID | Author (s)                | Study Title                                                                                                                                                                                                  | Technical Efficacy Outcomes | Diagnostic Accuracy Outcomes | Diagnostic Thinking Outcomes | Therapeutic Efficacy Outcomes | Patient Outcomes | Societal Outcomes | Other Outcomes |
|-----------|---------------------------|--------------------------------------------------------------------------------------------------------------------------------------------------------------------------------------------------------------|-----------------------------|------------------------------|------------------------------|-------------------------------|------------------|-------------------|----------------|
| 4         | Assadipour et.al (2017)   | SDHB mutation status and tumor size but not tumor grade are important predictors of clinical outcome in pheochromocytoma and abdominal paraganglioma                                                         |                             |                              |                              |                               | X                |                   |                |
| 5         | Bardai et.al (2017)       | Molecular diagnosis in children with fractures but no extraskeletal signs of osteogenesis imperfecta                                                                                                         |                             | X                            |                              |                               |                  |                   |                |
| 7         | Bornstein et.al (2017)    | Universal Prenatal Chromosomal Microarray Analysis: Additive Value and Clinical Dilemmas in Fetuses with a Normal Karyotype                                                                                  |                             | X                            |                              |                               |                  |                   |                |
| 8         | Brasen et.al (2017)       | Combination of real-time PCR and sequencing to detect multiple clinically relevant genetic variations in the lactase gene                                                                                    | X                           |                              |                              |                               |                  |                   |                |
| 9         | Bryce et.al (2017)        | Experience with precision genomics and tumor board, indicates frequent target identification, but barriers to delivery                                                                                       |                             | X                            |                              | X                             | X                |                   |                |
| 10        | Buchanan et.al (2017)     | Tumor testing to identify lynch syndrome in two Australian colorectal cancer cohorts                                                                                                                         | X                           | X                            |                              |                               |                  |                   |                |
| 11        | Bunnell et.al (2017)      | The Clinical Utility of Next Generation Sequencing Results in a Community-Based Hereditary Cancer Risk Program                                                                                               |                             | X                            |                              | X                             |                  |                   |                |
| 17        | Chimukangara et.al (2017) | HIV drug resistance testing among patients failing second line antiretroviral therapy. Comparison of in-house and commercial sequencing                                                                      | X                           | X                            |                              |                               |                  |                   |                |
| 18        | Cockerell et.al (2017)    | The influence of a gene-expression signature on the treatment of diagnostically challenging melanocytic lesions                                                                                              |                             | X                            |                              | X                             |                  |                   |                |
| 21        | Fan et.al (2017)          | Diagnostic Application of Targeted Next-Generation Sequencing of 80 Genes Associated with Disorders of Sexual Development                                                                                    |                             | X                            |                              |                               |                  |                   |                |
| 22        | Fenstermaker et.al (2017) | Risk Stratification by Urinary Prostate Cancer Gene 3 Testing Before Magnetic Resonance Imaging-Ultrasound Fusion-targeted Prostate Biopsy Among Men With No History of Biopsy                               | X                           | X                            |                              |                               |                  |                   |                |
| 30        | Hamblin et.al (2017)      | Clinical applicability and cost of a 46-gene panel for genomic analysis of solid tumours: Retrospective validation and prospective audit in the UK National Health Service                                   | X                           | X                            |                              | X                             |                  | X                 |                |
| 31        | Haslem et.al (2017)       | A retrospective analysis of precision medicine outcomes in patients with advanced cancer reveals improved progression-free survival without increased health care costs                                      |                             |                              |                              |                               | X                | X                 |                |
| 33        | Hermel et.al (2017)       | Multi-gene panel testing for hereditary cancer susceptibility in a rural Familial Cancer Program                                                                                                             |                             | X                            |                              | X                             |                  |                   |                |
| 34        | Hoang et.al (2017)        | Does personal genome testing drive service utilization in an adult preventive medicine clinic?                                                                                                               |                             |                              |                              | X                             |                  |                   |                |
| 36        | Jiang and You (2017)      | CYP2C19 LOF and GOF-Guided Antiplatelet Therapy in Patients with Acute Coronary Syndrome: A Cost-Effectiveness Analysis                                                                                      |                             |                              |                              |                               | X                | X                 |                |
| 37        | Jutkowitz et.al (2017)    | The cost-effectiveness of HLA-B*5801 screening to guide initial urate-lowering therapy for gout in the United States                                                                                         |                             |                              |                              |                               | X                | X                 |                |
| 39        | Kim et.al (2017)          | Diagnostic yield of targeted gene panel sequencing to identify the genetic etiology of disorders of sex development                                                                                          |                             | X                            |                              |                               |                  |                   |                |
| 42        | Lahrouchi et.al (2017)    | Utility of Post-Mortem Genetic Testing in Cases of Sudden Arrhythmic Death Syndrome                                                                                                                          |                             | X                            |                              |                               |                  |                   |                |
| 43        | Lai et.al (2017)          | Identification of mosaic and segmental aneuploidies by next-generation sequencing in preimplantation genetic screening can improve clinical outcomes compared to array-comparative genomic hybridization     |                             | X                            |                              |                               | X                |                   |                |
| 44        | Lambe et.al (2017)        | Auditing the frequency and the clinical and economic impact of testing for Fabry disease in patients under the age of 70 with a stroke admitted to Saint Vincent's University Hospital over a 6-month period |                             | X                            |                              |                               |                  |                   |                |
| 46        | Lazaro et.al (2017)       | Cost-effectiveness of a cascade screening program for the early detection of familial hypercholesterolemia                                                                                                   |                             |                              |                              |                               | X                | X                 |                |
| 48        | Li et.al (2017)           | A Multigene Test Could Cost-Effectively Help Extend Life Expectancy for Women at Risk of Hereditary Breast Cancer                                                                                            |                             |                              |                              |                               | X                | X                 |                |
| 50        | Mannelli et.al (2017)     | CEBPA-double-mutated acute myeloid leukemia displays a unique phenotypic profile: A reliable screening method and insight into biological features                                                           | X                           | X                            |                              |                               |                  |                   |                |
| 51        | Martinez et.al (2017)     | High diagnostic yield of syndromic intellectual disability by targeted next-generation sequencing                                                                                                            | X                           | X                            |                              |                               |                  |                   |                |
| 53        | Mellert et.al (2017)      | Development and Clinical Utility of a Blood-Based Test Service for the Rapid Identification of Actionable Mutations in Non-Small Cell Lung Carcinoma                                                         | X                           | X                            |                              |                               |                  |                   | X              |
| 55        | Mitchell et.al (2017)     | Economic Evaluation of a Pharmacogenomics Test for Statin-Induced Myopathy in Cardiovascular High-Risk Patients Initiating a Statin                                                                          |                             |                              |                              |                               |                  | X                 |                |
| 61        | Nussbaum et.al (2017)     | Modern treatment approaches in psychoses. Pharmacogenetic, neuroimaging and clinical implications                                                                                                            |                             |                              |                              |                               | X                |                   |                |
| 63        | Olson et.al (2017)        | Clinical Impact of Pharmacogenetic-Guided Treatment for Patients Exhibiting Neuropsychiatric Disorders: A Randomized Controlled Trial                                                                        |                             |                              |                              | X                             | X                | X                 |                |
| 64        | Page et.al (2017)         | Diagnostic tests for evaluation of stillbirth: Results from the stillbirth collaborative research network                                                                                                    |                             |                              | X                            |                               |                  |                   |                |
| 66        | Perucca et.al (2017)      | Real-world utility of whole exome sequencing with targeted gene analysis for focal epilepsy                                                                                                                  |                             | X                            |                              | X                             |                  |                   |                |
| 71        | Rubio et.al (2017)        | In vitro fertilization with preimplantation genetic diagnosis for aneuploidies in advanced maternal age: a randomized, controlled study                                                                      |                             |                              |                              |                               | X                |                   |                |
| 72        | Seco et.al (2017)         | The diagnostic yield of whole-exome sequencing targeting a gene panel for hearing impairment in the Netherlands                                                                                              |                             | X                            |                              |                               |                  |                   |                |
| 73        | Sharma et.al (2017)       | An observational study of the impact of genetic testing for pain perception in the clinical management of chronic non-cancer pain                                                                            |                             |                              |                              | X                             | X                |                   |                |
| 75        | Souzeau et.al (2017)      | Myocilin Predictive Genetic Testing for Primary Open-Angle Glaucoma Leads to Early Identification of At-Risk Individuals                                                                                     |                             | X                            |                              |                               | X                |                   | X              |
| 77        | Swartz et.al (2017)       | Variation in the clinical and genetic evaluation of undervirilized boys with bifid scrotum and hypospadias                                                                                                   |                             | X                            |                              |                               |                  |                   |                |
| 78        | Taylor et.al (2017)       | Panel-Based Clinical Genetic Testing in 85 Children with Inherited Retinal Disease                                                                                                                           |                             | X                            |                              |                               |                  |                   |                |
| 80        | Vermeer et.al (2017)      | Transthyretin amyloidosis: a phenocopy of hypertrophic cardiomyopathy                                                                                                                                        |                             | X                            |                              |                               |                  |                   |                |
| 81        | Weissinger et.al (2017)   | Performance Testing of RREB1, MYB, and CCND1 Fluorescence in Situ Hybridization in Spindle-Cell and Desmoplastic Melanoma Argues for a Two-Step Test Algorithm                                               | X                           | X                            |                              |                               |                  |                   |                |
| 88        | Alliende et.al (2016)     | Accuracy of a genetic test for the diagnosis of hypolactasia in Chilean children: Comparison with the breath test                                                                                            | X                           | X                            |                              |                               |                  |                   |                |
| 90        | Aydogan et.al (2016)      | Distribution of RET mutations and evaluation of treatment approaches in hereditary medullary thyroid carcinoma in Turkey                                                                                     |                             | X                            |                              | X                             |                  |                   |                |
| 92        | Bagnall et.al (2016)      | A Prospective Study of Sudden Cardiac Death among Children and Young Adults                                                                                                                                  |                             | X                            |                              |                               |                  |                   |                |
| 97        | Baptista et.al (2016)     | Adopting genetics: Motivations and outcomes of personal genomic testing in adult adoptees                                                                                                                    |                             |                              |                              |                               | X                | X                 |                |
| 99        | Bilous et.al (2016)       | Detection of notch1 c.7544-7545delct mutation in chronic lymphocytic leukemia using conventional and real- Time polymerase chain reaction                                                                    | X                           | X                            |                              |                               |                  |                   |                |
| 102       | Bonfanti et.al (2016)     | A cost analysis of inherited colorectal cancer care in Varese Province                                                                                                                                       |                             |                              |                              |                               |                  | X                 |                |

|     |                                |                                                                                                                                                                                                                                                    |   |   |   |   |   |   |   |   |
|-----|--------------------------------|----------------------------------------------------------------------------------------------------------------------------------------------------------------------------------------------------------------------------------------------------|---|---|---|---|---|---|---|---|
| 104 | Brahm et.al (2016)             | Genetic Confirmation Rate in Clinically Suspected Maturity-Onset Diabetes of the Young                                                                                                                                                             |   | X |   |   |   |   |   |   |
| 107 | Butzke et.al (2016)            | The cost-effectiveness of UGT1A1 genotyping before colorectal cancer treatment with irinotecan from the perspective of the German statutory health insurance                                                                                       |   |   |   |   |   | X | X |   |
| 109 | Camps et.al (2016)             | Gene panel sequencing improves the diagnostic work-up of patients with idiopathic erythrocytosis and identifies new mutations                                                                                                                      | X | X |   |   |   |   |   |   |
| 110 | Cardoso et.al (2016)           | 70-Gene Signature as an Aid to Treatment Decisions in Early-Stage Breast Cancer                                                                                                                                                                    |   |   |   |   |   | X |   |   |
| 111 | Castellani et.al (2016)        | Cystic fibrosis carrier screening effects on birth prevalence and newborn screening                                                                                                                                                                |   | X |   |   |   |   |   | X |
| 112 | Chang et.al (2016)             | Outcomes of in vitro fertilization with preimplantation genetic diagnosis: an analysis of the United States Assisted Reproductive Technology Surveillance Data, 2011-2012                                                                          |   |   |   |   |   | X |   |   |
| 113 | Chen et.al (2016)              | Real-world cost-effectiveness of pharmacogenetic screening for epilepsy treatment                                                                                                                                                                  |   |   |   |   |   |   | X |   |
| 122 | Ding et.al (2016)              | Identification of a panel of five serum miRNAs as a biomarker for Parkinson's disease                                                                                                                                                              | X |   |   |   |   |   |   |   |
| 129 | Eggers et.al (2016)            | Disorders of sex development: Insights from targeted gene sequencing of a large international patient cohort                                                                                                                                       | X | X |   |   |   |   |   |   |
| 132 | Evans et.al (2016)             | Impact of genomic testing and patient-reported outcomes on receipt of adjuvant chemotherapy                                                                                                                                                        |   |   |   |   | X | X |   |   |
| 135 | Favalli et.al (2016)           | Genetic Screening of Anderson-Fabry Disease in Proband Referrals From Multispecialty Clinics                                                                                                                                                       |   | X |   |   |   |   |   |   |
| 137 | Franasiak et.al (2016)         | Expanded carrier screening in an infertile population: How often is clinical decision making affected?                                                                                                                                             |   |   |   |   | X |   |   |   |
| 140 | Gammal et.al (2016)            | Pharmacogenetics for safe codeine use in sickle cell disease                                                                                                                                                                                       |   |   |   |   | X |   |   |   |
| 143 | Godino et.al (2016)            | Lifestyle Advice Combined with Personalized Estimates of Genetic or Phenotypic Risk of Type 2 Diabetes, and Objectively Measured Physical Activity: A Randomized Controlled Trial                                                                  |   |   |   |   |   | X |   |   |
| 149 | Helbig et.al (2016)            | Diagnostic exome sequencing provides a molecular diagnosis for a significant proportion of patients with epilepsy                                                                                                                                  |   | X |   |   |   |   |   |   |
| 150 | Hertz et.al (2016)             | Next-generation sequencing of 100 candidate genes in young victims of suspected sudden cardiac death with structural abnormalities of the heart                                                                                                    |   | X |   |   |   |   |   |   |
| 155 | Italiano et.al (2016)          | Clinical effect of molecular methods in sarcoma diagnosis (GENSARC): a prospective, multicentre, observational study                                                                                                                               | X | X | X | X |   |   |   |   |
| 157 | Jang et.al (2016)              | Significance of KIT exon 17 mutation depends on mutant level rather than positivity in core-binding factor acute myeloid leukemia                                                                                                                  | X | X |   |   |   |   |   |   |
| 161 | Kang et.al (2016)              | Targeted exome sequencing resolves allelic and the genetic heterogeneity in the genetic diagnosis of nephronophthisis-related ciliopathy                                                                                                           | X | X |   |   |   |   |   |   |
| 165 | Kotdawala et.al (2016)         | Aneuploidy screening by array comparative genomic hybridization improves success rates of in vitro fertilization: A multicenter Indian study                                                                                                       |   | X |   |   |   | X |   |   |
| 167 | Kuperberg et.al (2016)         | Utility of Whole Exome Sequencing for Genetic Diagnosis of Previously Undiagnosed Pediatric Neurology Patients                                                                                                                                     |   | X |   |   | X |   |   |   |
| 169 | Kwak et.al (2016)              | Clinical whole exome sequencing in early onset diabetes patients                                                                                                                                                                                   | X | X |   |   |   |   |   |   |
| 171 | Langer et.al (2016)            | Hereditary cancer testing in patients with ovarian cancer using a 25-gene panel                                                                                                                                                                    |   | X |   |   |   |   |   |   |
| 173 | Lazaridis et.al (2016)         | Outcome of Whole Exome Sequencing for Diagnostic Odyssey Cases of an Individualized Medicine Clinic: The Mayo Clinic Experience                                                                                                                    |   | X |   |   |   |   | X | X |
| 179 | Lingen et.al (2016)            | Obtaining a genetic diagnosis in a child with disability: impact on parental quality of life                                                                                                                                                       |   |   |   |   |   |   |   | X |
| 181 | Lo, et.al (2016)               | Limited Clinical Utility of Non-invasive Prenatal Testing for Subchromosomal Abnormalities                                                                                                                                                         | X | X |   |   |   |   |   |   |
| 187 | Majumdar et.al (2016)          | Preimplantation genetic screening for all 24 chromosomes by microarray comparative genomic hybridization significantly increases implantation rates and clinical pregnancy rates in patients undergoing in vitro fertilization with poor prognosis |   | X |   |   |   | X |   |   |
| 189 | Mannan et.al (2016)            | Detection of high frequency of mutations in a breast and/or ovarian cancer cohort: implications of embracing a multi-gene panel in molecular diagnosis in India                                                                                    |   | X |   |   |   |   |   |   |
| 192 | Monies et.al (2016)            | A first-line diagnostic assay for limb-girdle muscular dystrophy and other myopathies                                                                                                                                                              |   | X |   |   |   |   |   |   |
| 193 | Monroe et.al (2016)            | Effectiveness of whole-exome sequencing and costs of the traditional diagnostic trajectory in children with intellectual disability                                                                                                                |   | X |   |   |   |   | X |   |
| 195 | Murugappan et.al (2016)        | Intent to treat analysis of in vitro fertilization and preimplantation genetic screening versus expectant management in patients with recurrent pregnancy loss                                                                                     |   |   |   |   |   | X |   |   |
| 196 | Musleh et.al (2016)            | Diagnosing the cause of bilateral paediatric cataracts: comparison of standard testing with a next-generation sequencing approach                                                                                                                  |   | X |   |   |   |   |   |   |
| 199 | Nunn et.al (2016)              | Diagnostic yield of molecular autopsy in patients with sudden arrhythmic death syndrome using targeted exome sequencing                                                                                                                            |   | X |   |   |   |   |   |   |
| 200 | Nussbaum et.al (2016)          | The prognostic and clinical significance of neuroimaging and neurobiological vulnerability markers in correlation with the molecular pharmacogenetic testing in psychoses and ultra high-risk categories                                           |   |   |   |   |   | X |   |   |
| 205 | Orvieto et.al (2016)           | Should pre-implantation genetic screening be implemented to routine clinical practice?                                                                                                                                                             | X | X |   |   |   |   |   |   |
| 211 | Qiu et.al (2016)               | Quality of Life and Psychological State in Chinese Breast Cancer Patients Who Received BRCA1/2 Genetic Testing                                                                                                                                     |   |   |   |   |   | X |   |   |
| 212 | Ricker et.al (2016)            | Increased yield of actionable mutations using multi-gene panels to assess hereditary cancer susceptibility in an ethnically diverse clinical cohort                                                                                                |   | X |   |   | X |   |   |   |
| 215 | Rudnik-Schoneborn et.al (2016) | Diagnostic algorithms in Charcot-Marie-Tooth neuropathies: experiences from a German genetic laboratory on the basis of 1206 index patients                                                                                                        |   | X |   |   |   |   |   |   |
| 216 | Sabatini et.al (2016)          | Genomic Sequencing Procedure Microcosting Analysis and Health Economic Cost-Impact Analysis: A Report of the Association for Molecular Pathology                                                                                                   |   |   |   |   |   |   | X |   |
| 217 | Sakuma et.al (2016)            | An effective screening strategy for deafness in combination with a next-generation sequencing platform: a consecutive analysis                                                                                                                     |   | X |   |   |   |   |   |   |
| 218 | Samarakoon et.al (2016)        | cnvScan: A CNV screening and annotation tool to improve the clinical utility of computational CNV prediction from exome sequencing data                                                                                                            | X | X |   |   |   |   |   |   |
| 219 | Schenkel et.al (2016)          | Clinical Validation of Fragile X Syndrome Screening by DNA Methylation Array                                                                                                                                                                       | X |   |   |   |   |   |   |   |
| 221 | Shen et.al (2016)              | Clinical Value of CYP2C19 Genetic Testing for Guiding the Antiplatelet Therapy in a Chinese Population                                                                                                                                             |   |   |   |   |   | X |   |   |
| 222 | Shirts et.al (2016)            | Improving performance of multigene panels for genomic analysis of cancer predisposition                                                                                                                                                            |   | X |   |   |   |   |   |   |
| 224 | Sholl et.al (2016)             | Institutional implementation of clinical tumor profiling on an unselected cancer population                                                                                                                                                        | X | X |   |   |   |   |   |   |
| 226 | Siu et.al (2016)               | Diagnostic yield of array CGH in patients with autism spectrum disorder in Hong Kong                                                                                                                                                               |   | X |   |   |   |   |   |   |
| 229 | Spanaki et.al (2016)           | Psychosocial adjustment and quality of life in children undergoing screening in a specialist paediatric hypertrophic cardiomyopathy clinic                                                                                                         |   |   |   |   |   | X |   |   |

|     |                               |                                                                                                                                                                                                                                         |   |   |   |  |   |   |   |
|-----|-------------------------------|-----------------------------------------------------------------------------------------------------------------------------------------------------------------------------------------------------------------------------------------|---|---|---|--|---|---|---|
| 231 | Stark et.al (2016)            | A prospective evaluation of whole-exome sequencing as a first-tier molecular test in infants with suspected monogenic disorders                                                                                                         |   |   | X |  | X |   |   |
| 232 | Stattin et.al (2016)          | Genetic screening in sudden cardiac death in the young can save future lives                                                                                                                                                            |   |   | X |  | X |   |   |
| 235 | Sugita et.al (2016)           | Diagnostic use of fluorescence in situ hybridization in expert review in a phase 2 study of trabectedin monotherapy in patients with advanced, translocation-related sarcoma                                                            |   |   | X |  |   |   |   |
| 236 | Sukenik-Halevy et.al (2016)   | Clinical aspects of prenatally detected congenital heart malformations and the yield of chromosomal microarray analysis                                                                                                                 |   |   | X |  |   |   |   |
| 239 | Thevenon, J. et.al (2016)     | Diagnostic odyssey in severe neurodevelopmental disorders: toward clinical whole-exome sequencing as a first-line diagnostic test                                                                                                       |   |   | X |  |   |   |   |
| 241 | Tiegs et.al (2016)            | Discrepant diagnosis rate of array comparative genomic hybridization in thawed euploid blastocysts                                                                                                                                      | X | X |   |  |   |   |   |
| 243 | Tortoriello et.al (2016)      | Reanalysis of human blastocysts with different molecular genetic screening platforms reveals significant discordance in ploidy status                                                                                                   | X | X |   |  |   |   |   |
| 245 | Vachani et.al (2016)          | Clinical Utility of a Bronchial Genomic Classifier in Patients With Suspected Lung Cancer                                                                                                                                               | X | X |   |  | X |   |   |
| 248 | Visser et.al (2016)           | Long-Term Outcome of Patients Initially Diagnosed with Idiopathic Ventricular Fibrillation                                                                                                                                              |   |   | X |  |   |   |   |
| 250 | Walker et.al (2016)           | Analytical Performance of Multiplexed Screening Test for 10 Antibiotic Resistance Genes from Perianal Swab Samples                                                                                                                      | X |   |   |  |   |   |   |
| 251 | Wallbillich et.al (2016)      | A personalized paradigm in the treatment of platinum-resistant ovarian cancer - A cost utility analysis of genomic-based versus cytotoxic therapy                                                                                       |   |   |   |  |   |   | X |
| 253 | Wang et.al (2016)             | A specially designed multi-gene panel facilitates genetic diagnosis in children with intrahepatic cholestasis: Simultaneous test of known large insertions/deletions                                                                    | X | X |   |  |   |   |   |
| 257 | Waterman et.al (2016)         | The clinical utility of genetic testing of tissues from pregnancy losses                                                                                                                                                                |   |   | X |  |   |   |   |
| 258 | Weerakkody et.al (2016)       | Targeted next-generation sequencing makes new molecular diagnoses and expands genotype-phenotype relationship in Ehlers-Danlos syndrome                                                                                                 |   |   | X |  |   |   |   |
| 260 | Wevers et.al (2016)           | Does rapid genetic counseling and testing in newly diagnosed breast cancer patients cause additional psychosocial distress? Results from a randomized clinical trial                                                                    |   |   | X |  |   | X |   |
| 262 | Wou et.al (2016)              | Analysis of tissue from products of conception and perinatal losses using QF-PCR and microarray: A three-year retrospective study resulting in an efficient protocol                                                                    | X | X |   |  |   |   |   |
| 264 | Yablonski-Peretz et.al (2016) | Screening for germline mutations in breast/ovarian cancer susceptibility genes in high-risk families in Israel                                                                                                                          |   |   | X |  |   |   |   |
| 265 | Yadav et.al (2016)            | Outcomes of retesting BRCA negative patients using multigene panels                                                                                                                                                                     |   |   | X |  | X |   |   |
| 268 | Yao et.al (2016)              | Adult autoinflammatory disease frequency and our diagnostic experience in an adult autoinflammatory clinic                                                                                                                              |   |   | X |  |   |   |   |
| 272 | Yubero et.al (2016)           | Targeted Next Generation Sequencing in Patients with Inborn Errors of Metabolism                                                                                                                                                        |   |   | X |  |   |   |   |
| 274 | Zhang et.al (2016)            | Clinical application of next-generation sequencing in preimplantation genetic diagnosis cycles for Robertsonian and reciprocal translocations                                                                                           |   |   | X |  |   | X |   |
| 276 | Zhao et.al (2016)             | c-myc Gene Copy Number Variation in Cervical Exfoliated Cells Detected on Fluorescence in situ Hybridization for Cervical Cancer Screening                                                                                              | X | X |   |  |   |   |   |
| 278 | Zimmerman et.al (2016)        | Development and validation of concurrent preimplantation genetic diagnosis for single gene disorders and comprehensive chromosomal aneuploidy screening without whole genome amplification                                              | X | X |   |  |   | X |   |
| 280 | Akinrinade et.al (2015)       | Genetics and genotype-phenotype correlations in Finnish patients with dilated cardiomyopathy                                                                                                                                            | X | X |   |  |   |   |   |
| 283 | Alvarado et.al (2015)         | The impact of genomic testing on the recommendation for radiation therapy in patients with ductal carcinoma in situ: A prospective clinical utility assessment of the 12-gene DCIS score™ result                                        |   |   |   |  | X |   |   |
| 284 | Ankala et.al (2015)           | A comprehensive genomic approach for neuromuscular diseases gives a high diagnostic yield                                                                                                                                               | X | X |   |  |   |   |   |
| 285 | Antoniadi et.al (2015)        | Application of targeted multi-gene panel testing for the diagnosis of inherited peripheral neuropathy provides a high diagnostic yield with unexpected phenotype-genotype variability                                                   | X | X |   |  |   |   |   |
| 288 | Audrezet et.al (2015)         | Comprehensive CFTR gene analysis of the French cystic fibrosis screened newborn cohort: implications for diagnosis, genetic counseling, and mutation-specific therapy.[Erratum appears in Genet Med. 2015 Jan;17(1):93; PMID: 25569554] | X | X |   |  |   |   |   |
| 289 | Badani et.al (2015)           | Effect of a genomic classifier test on clinical practice decisions for patients with high-risk prostate cancer after surgery                                                                                                            |   |   |   |  | X |   |   |
| 292 | Baxter et.al (2015)           | Exome sequencing for the diagnosis of 46,XY disorders of sex development                                                                                                                                                                | X | X |   |  |   |   |   |
| 293 | Beltran et.al (2015)          | Whole-Exome Sequencing of Metastatic Cancer and Biomarkers of Treatment Response                                                                                                                                                        | X | X |   |  | X |   |   |
| 294 | Bennette et.al (2015)         | The cost-effectiveness of returning incidental findings from next-generation genomic sequencing                                                                                                                                         |   |   |   |  |   | X | X |
| 296 | Blank et.al (2015)            | Cost-Effectiveness Analysis of Prognostic Gene Expression Signature-Based Stratification of Early Breast Cancer Patients                                                                                                                |   |   |   |  |   | X | X |
| 298 | Bloss et.al (2015)            | A genome sequencing program for novel undiagnosed diseases.[Erratum appears in Genet Med. 2015 Jun;17(6):515; PMID: 26035803]                                                                                                           | X | X |   |  |   |   |   |
| 301 | Boutry-Kryza et.al (2015)     | Molecular characterization of a cohort of 73 patients with infantile spasms syndrome                                                                                                                                                    |   |   | X |  |   |   |   |
| 303 | Buckley et.al (2015)          | Current Practice and Utility of Chromosome Microarray Analysis in Infants Undergoing Cardiac Surgery                                                                                                                                    |   |   | X |  |   |   | X |
| 307 | Capalbo et.al (2015)          | Comparison of array comparative genomic hybridization and quantitative real-time PCR-based aneuploidy screening of blastocyst biopsies                                                                                                  | X | X |   |  |   |   |   |
| 314 | Coenen et.al (2015)           | Identification of Patients With Variants in TPMT and Dose Reduction Reduces Hematologic Events During Thiopurine Treatment of Inflammatory Bowel Disease                                                                                |   |   |   |  |   | X |   |
| 317 | D'Argenio et.al (2015)        | The molecular analysis of BRCA1 and BRCA2: Next-generation sequencing supersedes conventional approaches                                                                                                                                | X | X |   |  |   |   |   |
| 318 | De Franco et.al (2015)        | The effect of early, comprehensive genomic testing on clinical care in neonatal diabetes: An international cohort study                                                                                                                 |   |   | X |  |   |   | X |
| 322 | Dinan et.al (2015)            | Association Between Use of the 21-Gene Recurrence Score Assay and Receipt of Chemotherapy Among Medicare Beneficiaries With Early-Stage Breast Cancer, 2005-2009                                                                        |   |   |   |  | X |   |   |
| 325 | Elias et.al (2015)            | Clinical relevance and cost-effectiveness of HLA genotyping in children with Type 1 diabetes mellitus in screening for coeliac disease in the Netherlands                                                                               |   |   | X |  |   |   | X |
| 326 | Esplen et.al (2015)           | Long-term psychosocial and behavioral adjustment in individuals receiving genetic test results in Lynch syndrome                                                                                                                        |   |   |   |  |   | X |   |
| 332 | Garza et.al (2015)            | Development of a high-resolution melting curve analysis screening test for SRSF2 splicing factor gene mutations in myelodysplastic syndromes                                                                                            | X | X |   |  |   |   |   |
| 334 | Ghaoui et.al (2015)           | Use of Whole-Exome Sequencing for Diagnosis of Limb-Girdle Muscular Dystrophy Outcomes and Lessons Learned                                                                                                                              |   |   | X |  |   |   |   |

|     |                                  |                                                                                                                                                                                                             |   |   |   |  |   |   |   |   |
|-----|----------------------------------|-------------------------------------------------------------------------------------------------------------------------------------------------------------------------------------------------------------|---|---|---|--|---|---|---|---|
| 337 | Greco et.al (2015)               | Poorly differentiated neoplasms of unknown primary site: diagnostic usefulness of a molecular cancer classifier assay                                                                                       |   |   | X |  | X | X |   |   |
| 343 | Hartz et.al (2015)               | Return of individual genetic results in a high-risk sample: Enthusiasm and positive behavioral change                                                                                                       |   |   |   |  |   | X |   |   |
| 345 | Hayeems et.al (2015)             | Capturing the clinical utility of genomic testing: medical recommendations following pediatric microarray                                                                                                   |   | X |   |  | X |   |   |   |
| 349 | Howarth et.al (2015)             | Initial Results of Multigene Panel Testing for Hereditary Breast and Ovarian Cancer and Lynch Syndrome                                                                                                      |   | X |   |  |   |   |   |   |
| 354 | Jia et.al (2015)                 | The Diagnostic Value of Next Generation Sequencing in Familial Nonsyndromic Congenital Heart Defects                                                                                                        | X | X |   |  |   |   |   |   |
| 357 | Justino et.al (2015)             | Comprehensive massive parallel DNA sequencing strategy for the genetic diagnosis of the neuro-cardio-facio-cutaneous syndromes                                                                              | X | X |   |  |   |   |   |   |
| 359 | Kaimal et.al (2015)              | Prenatal Testing in the Genomic Age: Clinical Outcomes, Quality of Life, and Costs                                                                                                                          | X | X |   |  |   | X | X |   |
| 362 | Kapoor et.al (2015)              | Multigene Panel Testing Detects Equal Rates of Pathogenic BRCA1/2 Mutations and has a Higher Diagnostic Yield Compared to Limited BRCA1/2 Analysis Alone in Patients at Risk for Hereditary Breast Cancer   |   |   | X |  |   |   |   |   |
| 363 | Kapoor et.al (2015)              | Reducing hypersensitivity reactions with HLA-B*5701 genotyping before abacavir prescription: Clinically useful but is it cost-effective in Singapore?                                                       |   |   |   |  |   | X | X |   |
| 365 | Kharrazi et.al (2015)            | Newborn Screening for Cystic Fibrosis in California                                                                                                                                                         |   |   | X |  |   |   |   | X |
| 366 | Kim et.al (2015)                 | The NEXT-1 (Next-generation pERsonalized TX with MULTI-omics and preclinical model) trial: Prospective molecular screening trial of metastatic solid cancer patients, a feasibility analysis                | X | X |   |  | X | X |   |   |
| 367 | Koniialis and Pangalos (2015)    | Dilemmas in Prenatal Chromosomal Diagnosis Revealed Through a Single Center's 30 Years' Experience and 90,000 Cases                                                                                         |   | X |   |  |   |   |   |   |
| 369 | Kraus et.al (2015)               | Comprehensive screening for mutations associated with colorectal cancer in unselected cases reveals penetrant and nonpenetrant mutations                                                                    |   | X |   |  |   |   |   |   |
| 370 | Ladapo et.al (2015)              | Enhanced assessment of chest pain and related symptoms in the primary care setting through the use of a novel personalized medicine genomic test: results from a prospective registry study                 |   |   | X |  | X | X |   |   |
| 371 | Lanman et.al (2015)              | Analytical and Clinical Validation of a Digital Sequencing Panel for Quantitative, Highly Accurate Evaluation of Cell-Free Circulating Tumor DNA                                                            | X | X |   |  |   |   |   |   |
| 372 | Le Tourneau et.al (2015)         | Molecularly targeted therapy based on tumour molecular profiling versus conventional therapy for advanced cancer (SHIVA): a multicentre, open-label, proof-of-concept, randomised, controlled phase 2 trial |   |   |   |  |   | X |   |   |
| 373 | Lee et.al (2015)                 | High Diagnostic Yield of Whole Exome Sequencing in Participants with Retinal Dystrophies in a Clinical Ophthalmology Setting                                                                                |   |   | X |  |   |   |   |   |
| 375 | Lincoln et.al (2015)             | A Systematic Comparison of Traditional and Multigene Panel Testing for Hereditary Breast and Ovarian Cancer Genes in More Than 1000 Patients                                                                | X | X |   |  |   |   |   |   |
| 377 | Lipkus et.al (2015)              | A preliminary exploration of college smokers' reactions to nicotine dependence genetic susceptibility feedback                                                                                              |   |   |   |  |   | X |   |   |
| 380 | Lukaszuk et.al (2015)            | Routine use of next-generation sequencing for preimplantation genetic diagnosis of blastomeres obtained from embryos on day 3 in fresh in vitro fertilization cycles                                        |   |   |   |  |   | X |   |   |
| 381 | Luzon-Toro et.al (2015)          | Next-generation-based targeted sequencing as an efficient tool for the study of the genetic background in Hirschsprung patients                                                                             | X |   |   |  |   |   |   |   |
| 383 | Machens and Dralle (2015)        | Therapeutic Effectiveness of Screening for Multiple Endocrine Neoplasia Type 2A                                                                                                                             |   |   |   |  | X | X |   | X |
| 385 | Manchanda et.al (2015)           | Cost-effectiveness of population screening for BRCA mutations in Ashkenazi Jewish women compared with family history-based testing                                                                          |   |   |   |  |   | X | X |   |
| 386 | Manchanda et.al (2015)           | Population testing for cancer predisposing BRCA1/BRCA2 mutations in the Ashkenazi-Jewish community: a randomized controlled trial                                                                           |   | X |   |  |   | X |   |   |
| 390 | Meisel et.al (2015)              | Genetic susceptibility testing and readiness to control weight: Results from a randomized controlled trial                                                                                                  |   |   |   |  |   | X |   |   |
| 391 | Mercimek-Mahmutoglu et.al (2015) | Diagnostic yield of genetic testing in epileptic encephalopathy in childhood                                                                                                                                |   |   | X |  |   |   |   |   |
| 396 | Mody et.al (2015)                | Integrative clinical sequencing in the management of refractory or relapsed cancer in youth                                                                                                                 |   |   | X |  | X | X |   |   |
| 397 | Mohd et.al (2015)                | Spectrum of germ-line RB1 gene mutations in Malaysian patients with retinoblastoma                                                                                                                          |   |   | X |  |   |   |   |   |
| 400 | Morishita et.al (2015)           | Melting curve analysis after T allele enrichment (MelcaTle) as a highly sensitive and reliable method for detecting the JAK2V617F mutation                                                                  | X |   |   |  |   |   |   |   |
| 402 | Murugappan et.al (2015)          | Cost-effectiveness analysis of preimplantation genetic screening and in vitro fertilization versus expectant management in patients with unexplained recurrent pregnancy loss                               |   |   |   |  |   | X | X |   |
| 405 | Narita et.al (2015)              | Cost-effectiveness analysis of EGFR mutation testing and gefitinib as first-line therapy for non-small cell lung cancer                                                                                     |   |   |   |  |   | X | X |   |
| 406 | Neufeld-Kaiser et.al (2015)      | Positive predictive value of non-invasive prenatal screening for fetal chromosome disorders using cell-free DNA in maternal serum: independent clinical experience of a tertiary referral center            | X | X |   |  |   |   |   |   |
| 410 | Proost et.al (2015)              | Performant Mutation Identification Using Targeted Next-Generation Sequencing of 14 Thoracic Aortic Aneurysm Genes                                                                                           | X | X |   |  |   |   |   |   |
| 412 | Rajkumar et.al (2015)            | Targeted Resequencing of 30 Genes Improves the Detection of Deleterious Mutations in South Indian Women with Breast and/or Ovarian Cancers                                                                  |   |   | X |  |   |   |   |   |
| 414 | Reiff et.al (2015)               | Parents' Perceptions of the Usefulness of Chromosomal Microarray Analysis for Children with Autism Spectrum Disorders                                                                                       |   |   |   |  |   |   |   | X |
| 416 | Riuro et.al (2015)               | Genetic analysis, in silico prediction, and family segregation in long QT syndrome                                                                                                                          |   |   | X |  |   |   |   |   |
| 417 | Romei et.al (2015)               | Twenty years of lesson learning: how does the RET genetic screening test impact the clinical management of medullary thyroid cancer?                                                                        |   |   | X |  |   |   |   |   |
| 419 | Rujirabanjerd et.al (2015)       | Subtelomeric aberrations in Thai patients with idiopathic mental retardation and autism detected by multiplex ligation-dependent probe amplification                                                        |   |   | X |  |   |   |   |   |
| 420 | Sagoo et.al (2015)               | Cost Effectiveness of Using Array-CGH for Diagnosing Learning Disability                                                                                                                                    |   |   | X |  |   |   |   | X |
| 421 | Sakai et.al (2015)               | Extended RAS and BRAF Mutation Analysis Using Next-Generation Sequencing                                                                                                                                    | X | X |   |  |   |   |   |   |
| 422 | Severin et.al (2015)             | Economic evaluation of genetic screening for Lynch syndrome in Germany                                                                                                                                      |   |   |   |  |   | X | X |   |
| 423 | Shiffman et.al (2015)            | Genetic risk for atrial fibrillation could motivate patient adherence to warfarin therapy: A cost effectiveness analysis                                                                                    |   |   |   |  |   |   |   | X |
| 426 | Smyth et.al (2015)               | Economic impact of 21-gene recurrence score testing on early-stage breast cancer in Ireland                                                                                                                 |   |   |   |  | X |   |   | X |
| 427 | Snowhill et.al (2015)            | A model-based assessment of the cost-utility of strategies to identify Lynch syndrome in early-onset colorectal cancer patients                                                                             |   |   |   |  | X | X | X |   |
| 431 | Takeda et.al (2015)              | Clinical application of amplicon-based next-generation sequencing to therapeutic decision making in lung cancer                                                                                             |   |   | X |  | X | X |   |   |
| 434 | Taylor et.al (2015)              | Factors influencing success of clinical genome sequencing across a broad spectrum of disorders                                                                                                              |   |   | X |  |   |   |   |   |

|     |                         |                                                                                                                                                           |   |   |  |   |   |   |   |
|-----|-------------------------|-----------------------------------------------------------------------------------------------------------------------------------------------------------|---|---|--|---|---|---|---|
| 435 | Tsai et.al (2015)       | Cost-effectiveness analysis of carrier and prenatal genetic testing for X-linked hemophilia                                                               |   |   |  |   |   | X |   |
| 436 | Valencia et.al (2015)   | Clinical impact and cost-effectiveness of whole exome sequencing as a diagnostic tool: a pediatric center's experience                                    | X | X |  | X |   |   |   |
| 440 | Voils et.al (2015)      | Does Type 2 Diabetes Genetic Testing and Counseling Reduce Modifiable Risk Factors? A Randomized Controlled Trial of Veterans                             |   |   |  |   | X |   |   |
| 441 | Waldmuller et.al (2015) | Targeted 46-gene and clinical exome sequencing for mutations causing cardiomyopathies                                                                     | X | X |  |   |   |   |   |
| 443 | Willig et.al (2015)     | Whole-genome sequencing for identification of Mendelian disorders in critically ill infants: a retrospective analysis of diagnostic and clinical findings |   | X |  | X | X |   | X |
| 444 | Winner et.al (2015)     | Combinatorial pharmacogenomic guidance for psychiatric medications reduces overall pharmacy costs in a 1 year prospective evaluation                      |   |   |  |   |   | X |   |
| 445 | Wirrell et.al (2015)    | How should children with West syndrome be efficiently and accurately investigated? Results from the National Infantile Spasms Consortium                  |   | X |  |   |   |   |   |
| 446 | Yang et.al (2015)       | Randomized comparison of next-generation sequencing and array comparative genomic hybridization for preimplantation genetic screening: A pilot study      | X | X |  |   | X |   |   |
| 449 | Zheng et.al (2015)      | Application of next-generation sequencing for 24-chromosome aneuploidy screening of human preimplantation embryos                                         |   | X |  |   |   |   |   |
| 450 | Zhu et.al (2015)        | Whole-exome sequencing in undiagnosed genetic diseases: interpreting 119 trios                                                                            |   | X |  |   |   |   |   |
| 451 | Ziganshin et.al (2015)  | Routine Genetic Testing for Thoracic Aortic Aneurysm and Dissection in a Clinical Setting                                                                 |   | X |  |   |   |   |   |
